# Supplementary material for: Longitudinal Trajectories of Hair Cortisol: Hypothalamic-Pituitary-Adrenal Axis Dysfunction in Early Childhood
Source: Frontiers journal article supplement (doi:10.3389/fped.2021.740343), 2021-10-11
Supplement: Data_Sheet_7.PDF [file Data_Sheet_7.PDF]

**Supplementary Table F:**

Logistic regression model with p-values for Class 2B1 vs. Class 2B2 of longitudinal variables by clinic visit (CV) and category (family, maternal, child).

| CV1                                                  | Class 2B2<br>n=113  | Class 2B1<br>n=65 | P-value    |          |
|------------------------------------------------------|---------------------|-------------------|------------|----------|
| <u>Family</u>                                        |                     |                   |            |          |
| M1, DEM_ Race                                        | Black               | 33 (29.2%)        | 36 (55.4%) | 0.0005   |
|                                                      | White               | 78 (69.0%)        | 28 (43.1%) |          |
|                                                      | Asian               | 2 (1.8%)          | 0 (0.0%)   |          |
|                                                      | Other               | 0 (0.0%)          | 1 (1.5%)   |          |
| CV1, DEM_ Current married/partner status             | Never married       | 24 (21.2%)        | 23 (35.4%) | 0.034    |
|                                                      | Divorced            | 0 (0.0%)          | 2 (3.1%)   |          |
|                                                      | Separated           | 5 (4.4%)          | 0 (0.0%)   |          |
|                                                      | Living with partner | 10 (8.8%)         | 5 (7.7%)   |          |
|                                                      | Married             | 71 (62.8%)        | 34 (52.3%) |          |
|                                                      | Missing             | 3 (2.7%)          | 1 (1.5%)   |          |
| CV1, DEM_ Health insurance coverage (private/other)  | Public              | 34 (30.1%)        | 31 (47.7%) | 0.034    |
|                                                      | Private             | 75 (66.4%)        | 33 (50.8%) |          |
|                                                      | Missing             | 4 (3.5%)          | 1 (1.5%)   |          |
| CV1, DEM_ Estimated total annual household income    | <25K                | 31 (27.4%)        | 28 (43.1%) | 0.088    |
|                                                      | 25-65K              | 42 (37.2%)        | 18 (27.7%) |          |
|                                                      | > 65K               | 37 (32.7%)        | 16 (24.6%) |          |
|                                                      | Missing             | 3 (2.7%)          | 3 (4.6%)   |          |
| <u>Mother</u>                                        |                     |                   |            |          |
| M2, TLEQ_ Count of Adverse Child Events              | 0.4 (±0.8)          | 0.7 (±0.9)        | 0.009      |          |
|                                                      | Missing             | 3 (2.7%)          |            | 2 (3.1%) |
| M2, CTS_ Frequency of Physical Aggression Score Self | 2.3 (±3.7)          | 3.6 (±4.1)        | 0.015      |          |
|                                                      | Missing             | 3 (2.7%)          |            | 2 (3.1%) |
| CV1, CAPI_ Rigidity Scale Total Score                | 12.7 (±11.7)        | 18.2 (±14.7)      | 0.022      |          |
|                                                      | Missing             | 5 (4.4%)          |            | 1 (1.5%) |
| CV1, CAPI_ Abuse Scale Total Score                   | 62.1 (±50.9)        | 89.7 (±80.5)      | 0.047      |          |
|                                                      | Missing             | 5 (4.4%)          |            | 1 (1.5%) |

|                                            |  |             |             |              |
|--------------------------------------------|--|-------------|-------------|--------------|
| <b>HV1, Pregnant or breastfeeding</b>      |  |             |             | <b>0.092</b> |
| No                                         |  | 32 (28.3%)  | 27 (41.5%)  |              |
| Yes                                        |  | 74 (65.5%)  | 34 (52.3%)  |              |
| Missing                                    |  | 7 (6.2%)    | 4 (6.2%)    |              |
| <b>HV1, History of alcohol consumption</b> |  |             |             | <b>0.076</b> |
| No                                         |  | 50 (44.2%)  | 20 (30.8%)  |              |
| Yes                                        |  | 56 (49.6%)  | 41 (63.1%)  |              |
| Missing                                    |  | 7 (6.2%)    | 4 (6.2%)    |              |
| <b>M1, TEMPS_ Hyperthymic temperament</b>  |  |             |             | <b>0.056</b> |
| No                                         |  | 37 (32.7%)  | 31 (47.7%)  |              |
| Yes                                        |  | 76 (67.3%)  | 34 (52.3%)  |              |
| <b><u>Child</u></b>                        |  |             |             |              |
| <b>M3, NSF_ Birth length</b>               |  | 51.2 (±2.5) | 50.2 (±2.6) | <b>0.028</b> |
| Missing                                    |  | 1 (0.9%)    | 1 (1.5%)    |              |

| CV2                                                 |         | Class 2B2<br>n=113 | Class 2B1<br>n=65 | P-value |
|-----------------------------------------------------|---------|--------------------|-------------------|---------|
| <u>Family</u>                                       |         |                    |                   |         |
| M1, DEM_ Race                                       |         |                    |                   | 0.0005  |
|                                                     | Black   | 33 (29.2%)         | 36 (55.4%)        |         |
|                                                     | White   | 78 (69.0%)         | 28 (43.1%)        |         |
|                                                     | Asian   | 2 (1.8%)           | 0 (0.0%)          |         |
|                                                     | Other   | 0 (0.0%)           | 1 (1.5%)          |         |
| CV2, DEM_ Estimated total annual household income   |         |                    |                   | 0.062   |
|                                                     | <25K    | 29 (25.7%)         | 28 (43.1%)        |         |
|                                                     | 25-65K  | 39 (34.5%)         | 19 (29.2%)        |         |
|                                                     | >65K    | 40 (35.4%)         | 16 (24.6%)        |         |
|                                                     | Missing | 5 (4.4%)           | 2 (3.1%)          |         |
| CV2, DEM_ Health insurance coverage (private/other) |         |                    |                   | 0.079   |
|                                                     | Public  | 40 (35.4%)         | 32 (49.2%)        |         |
|                                                     | Private | 73 (64.6%)         | 32 (49.2%)        |         |
|                                                     | Missing | 0 (0.0%)           | 1 (1.5%)          |         |
| <u>Maternal</u>                                     |         |                    |                   |         |
| M2, TLEQ_ Count of Adverse Child Events             |         | 0.4 (±0.8)         | 0.7 (±0.9)        | 0.009   |
|                                                     | Missing | 3 (2.7%)           | 2 (3.1%)          |         |
| CV2, CAPI_ Abuse Scale Total Score                  |         | 65.9 (±67.1)       | 85.7 (±82.2)      | 0.08    |
|                                                     | Missing | 0 (0%)             | 1 (1.5%)          |         |
| CV1, BSI_ T-score for Somatization scale            |         | 46.8 (±7.9)        | 49.3 (±9.0)       | 0.069   |
|                                                     | Missing | 5 (4.4%)           | 1 (1.5%)          |         |

|                                                                           |  |                   |                   |              |
|---------------------------------------------------------------------------|--|-------------------|-------------------|--------------|
| <b>HV1, History of alcohol consumption</b>                                |  |                   |                   | <b>0.076</b> |
| Yes                                                                       |  | 50 (44.2%)        | 20 (30.8%)        |              |
| No                                                                        |  | 56 (49.6%)        | 41 (63.1%)        |              |
| Missing                                                                   |  | 7 (6.2%)          | 4 (6.2%)          |              |
| <b>HV1, Pregnant or breastfeeding</b>                                     |  |                   |                   | <b>0.092</b> |
| No                                                                        |  | 32 (28.3%)        | 27 (41.5%)        |              |
| Yes                                                                       |  | 74 (65.5%)        | 34 (52.3%)        |              |
| Missing                                                                   |  | 7 (6.2%)          | 4 (6.2%)          |              |
| <b><u>Child</u></b>                                                       |  |                   |                   |              |
| <b>CV2, BITSEA_ Internalizing subscale, subcomponent of Problem scale</b> |  | 1.8 ( $\pm$ 1.5)  | 2.5 ( $\pm$ 1.7)  | <b>0.008</b> |
| Missing                                                                   |  | 0 (0%)            | 1 (1.5%)          |              |
| <b>M3, NSF_ Birth length (cm)</b>                                         |  | 51.2 ( $\pm$ 2.5) | 50.2 ( $\pm$ 2.6) | <b>0.028</b> |
| Missing                                                                   |  | 1 (0.9%)          | 1 (1.5%)          |              |

| CV3                                      |         | Class 2B2<br>n=113 | Class 2B1<br>n=65 | P-value |
|------------------------------------------|---------|--------------------|-------------------|---------|
| <u>Family</u>                            |         |                    |                   |         |
| M1, DEM_ Race                            |         |                    |                   | 0.0005  |
|                                          | Black   | 33 (29.2%)         | 36 (55.4%)        |         |
|                                          | White   | 78 (69.0%)         | 28 (43.1%)        |         |
|                                          | Asian   | 2 (1.8%)           | 0 (0.0%)          |         |
|                                          | Other   | 0 (0.0%)           | 1 (1.5%)          |         |
| <u>Mother</u>                            |         |                    |                   |         |
| CV3, CAPI_ Unhappiness Scale Total Score |         | 8.4 (±8.0)         | 12.4 (±11.9)      | 0.026   |
|                                          | Missing | 6 (5.3%)           | 2 (3.1%)          |         |
| CV3, CAPI_ Abuse Scale Total Score       |         | 62.7 (±60.6)       | 86.6 (±81.8)      | 0.035   |
|                                          | Missing | 6 (5.3%)           | 2 (3.1%)          |         |
| CV3, CAPI_ Rigidity Scale Total Score    |         | 12.1 (±11.9)       | 17.3 (±15.4)      | 0.039   |
|                                          | Missing | 6 (5.3%)           | 2 (3.1%)          |         |
| HV1, History of alcohol consumption      |         |                    |                   |         |
|                                          | 1       | 50 (44.2%)         | 20 (30.8%)        | 0.076   |
|                                          | 2       | 56 (49.6%)         | 41 (63.1%)        |         |
|                                          | Missing | 7 (6.2%)           | 4 (6.2%)          |         |
| HV1, Pregnant or breastfeeding           |         |                    |                   |         |
|                                          | 1       | 32 (28.3%)         | 27 (41.5%)        | 0.092   |
|                                          | 2       | 74 (65.5%)         | 34 (52.3%)        |         |
|                                          | Missing | 7 (6.2%)           | 4 (6.2%)          |         |

| <u>Child</u>                             |         |                 |                 |       |
|------------------------------------------|---------|-----------------|-----------------|-------|
| CV3, CBCL_ Anxiety Problems %tile Rank   |         | 57.4<br>(±13.7) | 60.3<br>(±13.6) | 0.022 |
|                                          | Missing | 7 (6.2%)        | 2 (3.1%)        |       |
| M3, NSF_ Birth length (cm)               |         | 51.2 (±2.5)     | 50.2 (±2.6)     | 0.028 |
|                                          | Missing | 1 (0.9%)        | 1 (1.5%)        |       |
| CV3, CBCL_ Affective Problems %tile Rank |         | 60.8<br>(±12.7) | 56.4 (±9.4)     | 0.08  |
|                                          | Missing | 7 (6.2%)        | 2 (3.1%)        |       |
